# Supplementary material
Source: PubMed Central journal article supplement (PMC3030371)
Supplement: supp_M110.154799_jbc.M110.154799-1.pdf [file supp_M110.154799_jbc.M110.154799-1.pdf]

## Supplemental Fig. 1

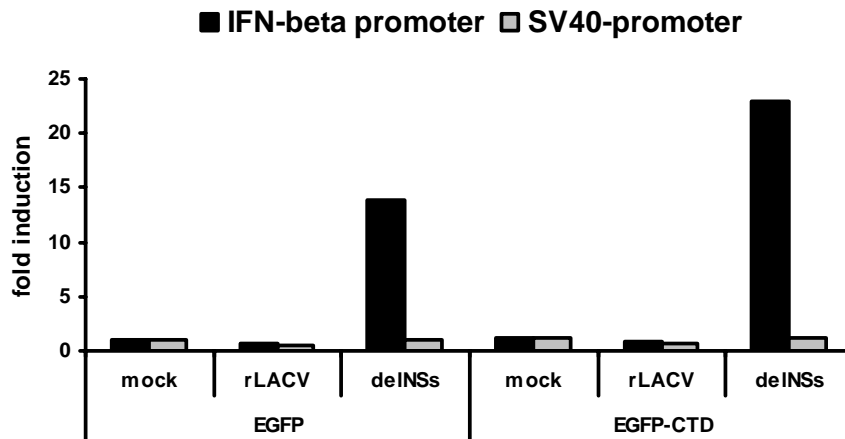

### No influence of exogenous CTD sequences on IFN suppression by LACV.

IFN- $\beta$  promoter assays. 293T cells grown in 12 well plates were transfected with 100 ng pRLSV40 (Promega) carrying the Renilla luciferase gene under control of the constitutively-active SV40 promoter, 250 ng of p125-luc carrying the Firefly luciferase gene under control of an IFN- $\beta$  promoter, and 1  $\mu$ g of either pEGFP-C1 or pEGFP-CTD expression constructs. After 8 h, cells were infected with rLACV or rLACVdelINSs, or left uninfected (mock), and incubated for further 18 h before luciferase activities were determined.

## Supplemental Fig. 2

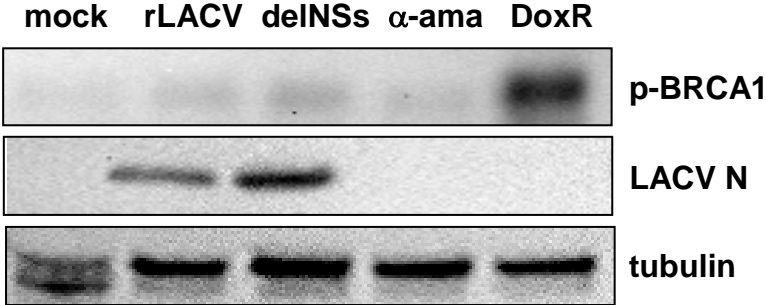

**Western blot analysis of BRCA1 activation.** Vero cells were mock infected, infected with rLACV or rLACVdelINSs, or treated with  $\alpha$ -ama or DoxR as indicated for Fig. 7. After 8 h incubation, cells were lysed and protein extracts tested for phosphorylation of Ser 1524 of BRCA1 (using Ab #9009, Cell Signaling), or LACV N expression or cellular tubulin as indicated for Fig. 7.
